# Supplementary material for: Controlled synthesis of Fe3O4@ZIF-8 nanoparticles for drug delivery
Source: Royal Society of Chemistry journal article supplement (doi:10.1039/c8ce01302k), 2018-01-01
Supplement: c8ce01302k1.pdf [file c8ce01302k1.pdf]

## Electronic supplementary information (ESI)

### Controlled synthesis of $\text{Fe}_3\text{O}_4@\text{ZIF-8}$ nanoparticles for drug delivery

Guihuan Chen <sup>a</sup>, Bing Yu <sup>a,b</sup>, Chenghao Lu <sup>a</sup>, Haohao Zhang <sup>a</sup>, Youqing Shen <sup>a,c</sup> and Hailin Cong <sup>a,b,\*</sup>

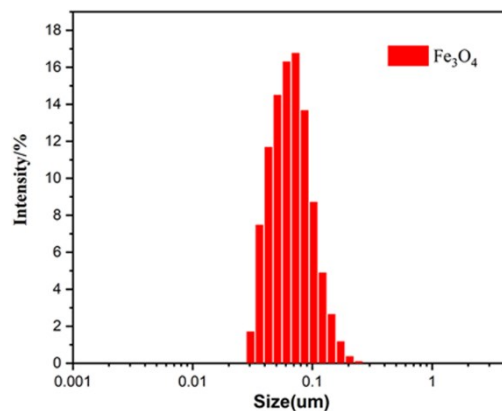

Figure S1. DLS of  $\text{Fe}_3\text{O}_4$ .

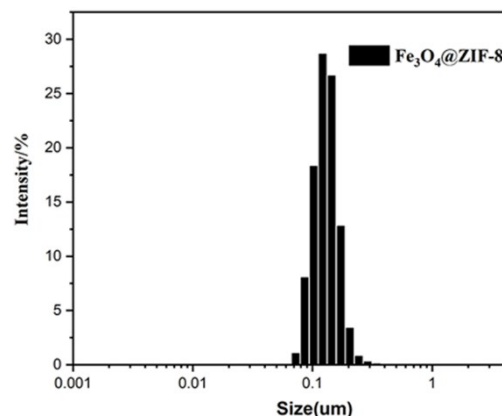

Figure S2. DLS of SCS-1.

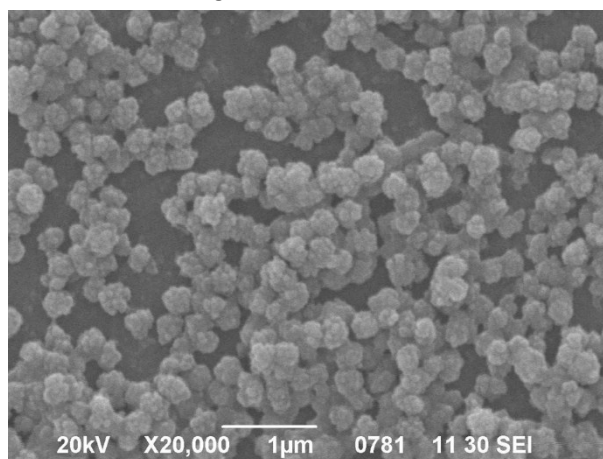

Figure S3. The SEM image of  $\text{Fe}_3\text{O}_4@\text{ZIF-8}$  NPs after loading of DOX.

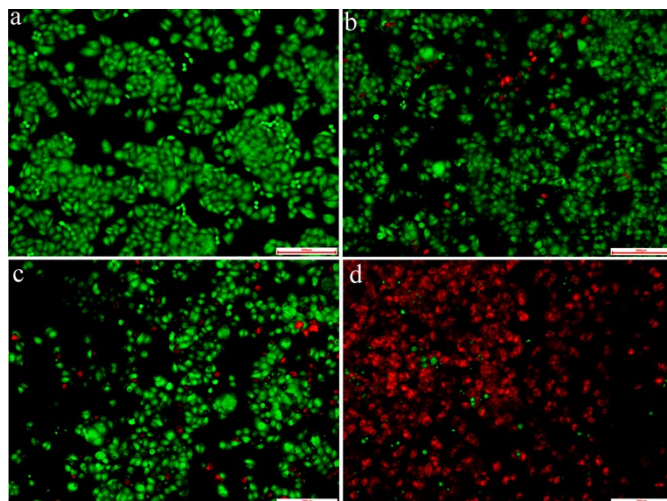

**Figure S4.** Live-dead staining images of the hela cells treated without  $\text{Fe}_3\text{O}_4@\text{ZIF-8}$  solution (a), treated with 4 mg/ml  $\text{Fe}_3\text{O}_4@\text{ZIF-8}$  solution (b). After treating with magnetic field and 808 nm laser, the live-dead staining images of the hela cells in the  $\text{Fe}_3\text{O}_4@\text{ZIF-8}$  deficiency area (c) and in the  $\text{Fe}_3\text{O}_4@\text{ZIF-8}$  enrichment area (d). (Live cells: green; dead cells: red; scale bar: 200  $\mu\text{m}$ ).
